# Supplementary material for: Diversity and Biosynthetic Potential of Culturable Microbes Associated with Toxic Marine Animals
Source: MDPI journal article supplement (doi:10.3390/md11082695), 2013-08-02
Supplement: s1 [file s1]

marinedrugs-11-02695-s001.mol
  corina  04141402183D 1   1.00000     0.00000 
CORINA 3.49 0023  12.04.2013
 23 26  0  0  0  0  0  0  0  0999 V2000
   -0.0820    1.5631    0.0257 C   0  0  0  0  0  0  0  0  0  0  0  0
   -1.3525    2.1250    0.0340 N   0  0  0  0  0  0  0  0  0  0  0  0
   -2.3586    1.5016   -0.8303 C   0  0  0  0  0  0  0  0  0  0  0  0
   -2.3635   -0.0109   -0.5765 C   0  0  0  0  0  0  0  0  0  0  0  0
   -0.9564   -0.5597   -0.8273 C   0  0  0  0  0  0  0  0  0  0  0  0
   -0.0130    0.1788    0.0300 N   0  0  0  0  0  0  0  0  0  0  0  0
   -3.3683   -0.6717   -1.5217 C   0  0  0  0  0  0  0  0  0  0  0  0
   -3.7500    2.0657   -0.5477 C   0  0  0  0  0  0  0  0  0  0  0  0
   -4.7661   -0.1170   -1.2104 C   0  0  0  0  0  0  0  0  0  0  0  0
   -4.7569    1.3916   -1.4879 C   0  0  0  0  0  0  0  0  0  0  0  0
   -4.3492    1.5987   -2.8441 O   0  0  0  0  0  0  0  0  0  0  0  0
   -3.0655    1.0572   -3.1636 C   0  0  0  0  0  0  0  0  0  0  0  0
   -3.0436   -0.3429   -2.8756 O   0  0  0  0  0  0  0  0  0  0  0  0
   -2.0054    1.7546   -2.3002 C   0  0  0  0  0  0  0  0  0  0  0  0
   -2.0127    3.1588   -2.5650 O   0  0  0  0  0  0  0  0  0  0  0  0
   -2.7873    1.2668   -4.5495 O   0  5  0  0  0  0  0  0  0  0  0  0
   -5.7346   -0.7547   -2.0454 O   0  0  0  0  0  0  0  0  0  0  0  0
   -0.9164   -1.9505   -0.5012 O   0  0  0  0  0  0  0  0  0  0  0  0
   -4.1086    1.7983    0.8095 O   0  0  0  0  0  0  0  0  0  0  0  0
    0.9922    2.3014    0.0197 N   0  3  0  0  0  0  0  0  0  0  0  0
   -1.0207    1.3419   -2.5196 H   0  0  0  0  0  0  0  0  0  0  0  0
   -5.1059   -0.3699    0.2598 C   0  0  0  0  0  0  0  0  0  0  0  0
   -6.3298    0.2914    0.5864 O   0  0  0  0  0  0  0  0  0  0  0  0
  3  4  1  0      
  4  5  1  0      
  5  6  1  0      
  6  1  1  0      
  4  7  1  0      
  3  8  1  0      
  7  9  1  0      
 10 11  1  0      
 11 12  1  0      
  7 13  1  0      
 13 12  1  0      
  3 14  1  0      
 14 12  1  0      
 14 15  1  0      
 12 16  1  0      
  9 17  1  0      
 18  5  1  0      
  8 19  1  0      
  1 20  2  0      
 14 21  1  0      
  1  2  1  0      
  3  2  1  0      
  8 10  1  0      
  9 10  1  0      
  9 22  1  0      
 22 23  1  0      
M  CHG  2  16  -1  20   1
M  STY  1   1 SUP
M  SLB  1   1   1
M  SAL   1  2  22  23
M  SBL   1  1  25
M  SMT   1 CH2OH
M  SBV   1 25   -6.2306    5.9317
M  END
$$$$
