# Supplementary material for: Diversity and Biosynthetic Potential of Culturable Microbes Associated with Toxic Marine Animals
Source: MDPI journal article supplement (doi:10.3390/md11082695), 2013-08-02
Supplement: s2 [file s2]

marinedrugs-11-02695-s001.mol
  ChemDraw12271311272D

 23 26  0  0  0  0  0  0  0  0999 V2000
   -1.7613    0.3411    0.0000 C   0  0  0  0  0  0  0  0  0  0  0  0
   -1.3488   -0.3733    0.0000 N   0  0  0  0  0  0  0  0  0  0  0  0
   -0.5507   -0.1642    0.0000 C   0  0  0  0  0  0  0  0  0  0  0  0
    0.2426   -0.3733    0.0000 C   0  0  0  0  0  0  0  0  0  0  0  0
   -0.1699    0.3411    0.0000 C   0  0  0  0  0  0  0  0  0  0  0  0
   -0.9680    0.1321    0.0000 N   0  0  0  0  0  0  0  0  0  0  0  0
    1.0395   -0.1598    0.0000 C   0  0  0  0  0  0  0  0  0  0  0  0
   -0.1382   -0.8787    0.0000 C   0  0  0  0  0  0  0  0  0  0  0  0
    1.4520   -0.8743    0.0000 C   0  0  0  0  0  0  0  0  0  0  0  0
    0.6587   -0.6652    0.0000 C   0  0  0  0  0  0  0  0  0  0  0  0
    0.6587    0.1598    0.0000 O   0  0  0  0  0  0  0  0  0  0  0  0
    0.2462    0.8743    0.0000 C   0  0  0  0  0  0  0  0  0  0  0  0
    1.0395    0.6652    0.0000 O   0  0  0  0  0  0  0  0  0  0  0  0
   -0.5507    0.6608    0.0000 C   0  0  0  0  0  0  0  0  0  0  0  0
   -0.5507    1.4858    0.0000 O   0  0  0  0  0  0  0  0  0  0  0  0
    0.2462    1.6993    0.0000 O   0  5  0  0  0  0  0  0  0  0  0  0
    1.4520   -1.6993    0.0000 O   0  0  0  0  0  0  0  0  0  0  0  0
    0.1419    0.2216    0.0000 O   0  0  0  0  0  0  0  0  0  0  0  0
   -0.7656   -0.7271    0.0000 O   0  0  0  0  0  0  0  0  0  0  0  0
   -2.0352    0.5945    0.0000 N   0  3  0  0  0  0  0  0  0  0  0  0
   -1.3476    0.8743    0.0000 H   0  0  0  0  0  0  0  0  0  0  0  0
    2.0352   -1.2431    0.0000 C   0  0  0  0  0  0  0  0  0  0  0  0
    1.4519   -0.6598    0.0000 O   0  0  0  0  0  0  0  0  0  0  0  0
  3  4  1  0      
  4  5  1  0      
  5  6  1  0      
  6  1  1  0      
  4  7  1  0      
  3  8  1  0      
  7  9  1  0      
 10 11  1  0      
 11 12  1  0      
  7 13  1  0      
 13 12  1  0      
  3 14  1  0      
 14 12  1  0      
 14 15  1  0      
 12 16  1  0      
  9 17  1  0      
 18  5  1  0      
  8 19  1  0      
  1 20  2  0      
 14 21  1  1      
  1  2  1  1      
  3  2  1  1      
  8 10  1  1      
  9 10  1  1      
  9 22  1  0      
 22 23  1  0      
M  CHG  2  16  -1  20   1
M  STY  1   1 SUP
M  SLB  1   1   1
M  SAL   1  2  22  23
M  SBL   1  1  25
M  SMT   1 CH2OH
M  SBV   1 25   -6.2306    5.9317
M  END
