# Supplementary material for: Diversity and Biosynthetic Potential of Culturable Microbes Associated with Toxic Marine Animals
Source: MDPI journal article supplement (doi:10.3390/md11082695), 2013-08-02
Supplement: s3 [file s3]

marinedrugs-11-02695-s002.mol
  corina  04141402183D 1   1.00000     0.00000 
CORINA 3.49 0023  12.04.2013
 35 40  0  0  0  0  0  0  0  0999 V2000
    0.2639    1.5311    0.4417 C   0  0  0  0  0  0  0  0  0  0  0  0
    0.2245    0.1480    0.4263 C   0  0  0  0  0  0  0  0  0  0  0  0
    1.4190   -0.5793    0.2811 C   0  0  0  0  0  0  0  0  0  0  0  0
    2.6385    0.0923    0.1453 C   0  0  0  0  0  0  0  0  0  0  0  0
    2.6592    1.4611    0.1648 C   0  0  0  0  0  0  0  0  0  0  0  0
    1.4807    2.1857    0.3114 C   0  0  0  0  0  0  0  0  0  0  0  0
    1.3825   -2.0461    0.2803 C   0  0  0  0  0  0  0  0  0  0  0  0
    2.6299   -2.7934   -0.1490 C   0  0  0  0  0  0  0  0  0  0  0  0
    3.8341   -2.0846    0.4860 C   0  0  0  0  0  0  0  0  0  0  0  0
    3.9303   -0.6555   -0.0338 C   0  0  0  0  0  0  0  0  0  0  0  0
    2.5429   -4.2208    0.4082 C   0  0  0  0  0  0  0  0  0  0  0  0
    3.8309   -4.9793    0.0763 C   0  0  0  0  0  0  0  0  0  0  0  0
    5.0214   -4.2542    0.7111 C   0  0  0  0  0  0  0  0  0  0  0  0
    5.1124   -2.8457    0.1098 C   0  0  0  0  0  0  0  0  0  0  0  0
    3.7451   -6.3807    0.6237 C   0  0  0  0  0  0  0  0  0  0  0  0
    3.2049   -7.4939   -0.2365 C   0  0  0  0  0  0  0  0  0  0  0  0
    3.2254   -8.7847    0.5410 C   0  0  0  0  0  0  0  0  0  0  0  0
    4.3472   -9.5185    0.5696 O   0  0  0  0  0  0  0  0  0  0  0  0
    2.1186   -9.1780    1.1990 C   0  0  0  0  0  0  0  0  0  0  0  0
    2.1295  -10.3868    1.9303 C   0  0  0  0  0  0  0  0  0  0  0  0
    3.2888  -11.1406    1.9502 C   0  0  0  0  0  0  0  0  0  0  0  0
    4.4092  -10.6757    1.2505 C   0  0  0  0  0  0  0  0  0  0  0  0
    2.4081   -4.1346    1.9352 C   0  0  0  0  0  0  0  0  0  0  0  0
    3.6941   -2.0914    1.9077 O   0  0  0  0  0  0  0  0  0  0  0  0
    4.8126   -4.1351    2.1216 O   0  0  0  0  0  0  0  0  0  0  0  0
    3.6391   -3.4011    2.4812 C   0  0  0  0  0  0  0  0  0  0  0  0
    3.5430   -3.3012    4.0049 C   0  0  0  0  0  0  0  0  0  0  0  0
    1.5212    3.5417    0.3265 O   0  0  0  0  0  0  0  0  0  0  0  0
   -0.9591   -0.5020    0.5508 O   0  0  0  0  0  0  0  0  0  0  0  0
    0.3813   -2.6447    0.6144 O   0  0  0  0  0  0  0  0  0  0  0  0
    4.1091   -6.6117    1.7517 O   0  0  0  0  0  0  0  0  0  0  0  0
    1.4182   -4.8978   -0.1564 O   0  0  0  0  0  0  0  0  0  0  0  0
    1.0267  -10.7989    2.5988 O   0  0  0  0  0  0  0  0  0  0  0  0
    5.4420  -11.3252    1.2544 O   0  0  0  0  0  0  0  0  0  0  0  0
    6.2257   -4.9739    0.4400 O   0  0  0  0  0  0  0  0  0  0  0  0
  1  2  2  0      
  2  3  1  0      
  3  4  2  0      
  4  5  1  0      
  5  6  2  0      
  6  1  1  0      
  3  7  1  0      
  7  8  1  0      
  8  9  1  0      
  9 10  1  0      
 10  4  1  0      
  8 11  1  0      
 11 12  1  0      
 12 13  1  0      
 13 14  1  0      
 14  9  1  0      
 12 15  1  0      
 15 16  1  0      
 16 17  1  0      
 17 18  1  0      
 17 19  2  0      
 19 20  1  0      
 20 21  2  0      
 21 22  1  0      
 22 18  1  0      
 11 23  1  0      
  9 24  1  0      
 13 25  1  0      
 23 26  1  0      
 25 26  1  0      
 24 26  1  0      
 26 27  1  0      
  6 28  1  0      
  2 29  1  0      
  7 30  2  0      
 15 31  2  0      
 11 32  1  0      
 20 33  1  0      
 22 34  2  0      
 13 35  1  0      
M  END
$$$$
