# Supplementary material for: Diversity and Biosynthetic Potential of Culturable Microbes Associated with Toxic Marine Animals
Source: MDPI journal article supplement (doi:10.3390/md11082695), 2013-08-02
Supplement: s4 [file s4]

marinedrugs-11-02695-s002.mol
  ChemDraw12271311282D

 35 40  0  0  0  0  0  0  0  0999 V2000
   -3.8728    0.6667    0.0000 C   0  0  0  0  0  0  0  0  0  0  0  0
   -3.5475   -0.0914    0.0000 C   0  0  0  0  0  0  0  0  0  0  0  0
   -2.7283   -0.1888    0.0000 C   0  0  0  0  0  0  0  0  0  0  0  0
   -2.2343    0.4721    0.0000 C   0  0  0  0  0  0  0  0  0  0  0  0
   -2.5597    1.2302    0.0000 C   0  0  0  0  0  0  0  0  0  0  0  0
   -3.3789    1.3275    0.0000 C   0  0  0  0  0  0  0  0  0  0  0  0
   -1.9138   -0.0572    0.0000 C   0  0  0  0  0  0  0  0  0  0  0  0
   -1.1460   -0.3591    0.0000 C   0  0  0  0  0  0  0  0  0  0  0  0
   -0.6520    0.3017    0.0000 C   0  0  0  0  0  0  0  0  0  0  0  0
   -1.4665    0.1703    0.0000 C   0  0  0  0  0  0  0  0  0  0  0  0
   -0.3315   -0.2276    0.0000 C   0  0  0  0  0  0  0  0  0  0  0  0
    0.4363   -0.5295    0.0000 C   0  0  0  0  0  0  0  0  0  0  0  0
    0.9304    0.1312    0.0000 C   0  0  0  0  0  0  0  0  0  0  0  0
    0.1159   -0.0002    0.0000 C   0  0  0  0  0  0  0  0  0  0  0  0
    0.4363   -1.3545    0.0000 C   0  0  0  0  0  0  0  0  0  0  0  0
    1.1508   -1.7670    0.0000 C   0  0  0  0  0  0  0  0  0  0  0  0
    1.8653   -1.3545    0.0000 C   0  0  0  0  0  0  0  0  0  0  0  0
    2.0788   -0.5577    0.0000 O   0  0  0  0  0  0  0  0  0  0  0  0
    2.4486   -1.9379    0.0000 C   0  0  0  0  0  0  0  0  0  0  0  0
    3.2455   -1.7244    0.0000 C   0  0  0  0  0  0  0  0  0  0  0  0
    3.4590   -0.9275    0.0000 C   0  0  0  0  0  0  0  0  0  0  0  0
    2.8757   -0.3441    0.0000 C   0  0  0  0  0  0  0  0  0  0  0  0
   -0.3315    0.5974    0.0000 C   0  0  0  0  0  0  0  0  0  0  0  0
   -0.6520    1.1267    0.0000 O   0  0  0  0  0  0  0  0  0  0  0  0
    0.9304    0.9562    0.0000 O   0  0  0  0  0  0  0  0  0  0  0  0
    0.0810    1.3119    0.0000 C   0  0  0  0  0  0  0  0  0  0  0  0
    0.0810    2.1369    0.0000 C   0  0  0  0  0  0  0  0  0  0  0  0
   -3.7914    2.0420    0.0000 O   0  0  0  0  0  0  0  0  0  0  0  0
   -3.9600   -0.8059    0.0000 O   0  0  0  0  0  0  0  0  0  0  0  0
   -2.1273   -0.8541    0.0000 O   0  0  0  0  0  0  0  0  0  0  0  0
   -0.2781   -1.7670    0.0000 O   0  0  0  0  0  0  0  0  0  0  0  0
   -0.9148   -0.8110    0.0000 O   0  0  0  0  0  0  0  0  0  0  0  0
    3.9600   -2.1369    0.0000 O   0  0  0  0  0  0  0  0  0  0  0  0
    3.2882    0.3703    0.0000 O   0  0  0  0  0  0  0  0  0  0  0  0
    1.6449   -0.2813    0.0000 O   0  0  0  0  0  0  0  0  0  0  0  0
  1  2  2  0      
  2  3  1  0      
  3  4  2  0      
  4  5  1  0      
  5  6  2  0      
  6  1  1  0      
  3  7  1  0      
  7  8  1  0      
  8  9  1  0      
  9 10  1  0      
 10  4  1  0      
  8 11  1  0      
 11 12  1  0      
 12 13  1  0      
 13 14  1  0      
 14  9  1  0      
 12 15  1  0      
 15 16  1  0      
 16 17  1  0      
 17 18  1  0      
 17 19  2  0      
 19 20  1  0      
 20 21  2  0      
 21 22  1  0      
 22 18  1  0      
 11 23  1  0      
  9 24  1  0      
 13 25  1  0      
 23 26  1  0      
 25 26  1  0      
 24 26  1  0      
 26 27  1  0      
  6 28  1  0      
  2 29  1  0      
  7 30  2  0      
 15 31  2  0      
 11 32  1  0      
 20 33  1  0      
 22 34  2  0      
 13 35  1  0      
M  END
