# Supplementary material for: Diversity and Biosynthetic Potential of Culturable Microbes Associated with Toxic Marine Animals
Source: MDPI journal article supplement (doi:10.3390/md11082695), 2013-08-02
Supplement: s5 [file s5]

marinedrugs-11-02695-s003.mol
  corina  04141402183D 1   1.00000     0.00000 
CORINA 3.49 0023  12.04.2013
 22 24  0  0  0  0  0  0  0  0999 V2000
   -0.0167    1.3790    0.0096 N   0  0  0  0  0  0  0  0  0  0  0  0
    0.0021   -0.0041    0.0020 C   0  0  0  0  0  0  0  0  0  0  0  0
    1.0889   -0.5832   -0.6068 N   0  0  0  0  0  0  0  0  0  0  0  0
    2.1344    0.1169   -1.3516 C   0  0  0  0  0  0  0  0  0  0  0  0
    2.1831    1.6146   -1.1028 C   0  0  0  0  0  0  0  0  0  0  0  0
    1.2585    2.0904    0.0013 C   0  0  0  0  0  0  0  0  0  0  0  0
    1.9476   -0.0289   -2.7991 N   0  0  0  0  0  0  0  0  0  0  0  0
    1.8775    1.2265   -3.3516 C   0  0  0  0  0  0  0  0  0  0  0  0
    1.7429    2.1969   -2.3890 N   0  0  0  0  0  0  0  0  0  0  0  0
    1.4653   -2.0046   -0.5907 C   0  0  0  0  0  0  0  0  0  0  0  0
    2.9968   -2.0602   -0.7720 C   0  0  0  0  0  0  0  0  0  0  0  0
    3.4387   -0.5827   -0.9201 C   0  0  0  0  0  0  0  0  0  0  0  0
    1.9502    1.8817    1.3499 C   0  0  0  0  0  0  0  0  0  0  0  0
    1.1272    2.4406    2.4076 O   0  0  0  0  0  0  0  0  0  0  0  0
    1.5964    2.3391    3.6655 C   0  0  0  0  0  0  0  0  0  0  0  0
    2.6644    1.7983    3.8738 O   0  0  0  0  0  0  0  0  0  0  0  0
    0.8814    2.8374    4.6936 N   0  0  0  0  0  0  0  0  0  0  0  0
    3.2065    1.9202   -0.8851 H   0  0  0  0  0  0  0  0  0  0  0  0
   -0.9513   -0.7130    0.5382 N   0  3  0  0  0  0  0  0  0  0  0  0
    1.9324    1.4672   -4.6314 N   0  3  0  0  0  0  0  0  0  0  0  0
    4.4419   -0.4522   -1.9293 O   0  0  0  0  0  0  0  0  0  0  0  0
    3.9029   -0.0647    0.3282 O   0  0  0  0  0  0  0  0  0  0  0  0
  1  2  1  0      
  2  3  1  0      
  3  4  1  0      
  4  5  1  0      
  5  6  1  0      
  6  1  1  0      
  4  7  1  0      
  7  8  1  0      
  8  9  1  0      
  9  5  1  0      
  3 10  1  0      
 10 11  1  0      
 11 12  1  0      
  6 13  1  0      
 13 14  1  0      
 14 15  1  0      
 15 16  2  0      
 15 17  1  0      
  5 18  1  0      
  4 12  1  0      
  2 19  2  0      
  8 20  2  0      
 12 21  1  0      
 12 22  1  0      
M  CHG  2  19   1  20   1
M  END
$$$$
