# Supplementary material for: Diversity and Biosynthetic Potential of Culturable Microbes Associated with Toxic Marine Animals
Source: MDPI journal article supplement (doi:10.3390/md11082695), 2013-08-02
Supplement: s6 [file s6]

marinedrugs-11-02695-s003.mol
  ChemDraw12271311282D

 22 24  0  0  0  0  0  0  0  0999 V2000
   -1.0473    0.2404    0.0000 N   0  0  0  0  0  0  0  0  0  0  0  0
   -1.0473   -0.5846    0.0000 C   0  0  0  0  0  0  0  0  0  0  0  0
   -0.3328   -0.9971    0.0000 N   0  0  0  0  0  0  0  0  0  0  0  0
    0.3817   -0.5846    0.0000 C   0  0  0  0  0  0  0  0  0  0  0  0
    0.3817    0.2404    0.0000 C   0  0  0  0  0  0  0  0  0  0  0  0
   -0.3328    0.6529    0.0000 C   0  0  0  0  0  0  0  0  0  0  0  0
    1.1663   -0.8396    0.0000 N   0  0  0  0  0  0  0  0  0  0  0  0
    1.6512   -0.1721    0.0000 C   0  0  0  0  0  0  0  0  0  0  0  0
    1.1663    0.4953    0.0000 N   0  0  0  0  0  0  0  0  0  0  0  0
   -0.1613   -1.8041    0.0000 C   0  0  0  0  0  0  0  0  0  0  0  0
    0.6592   -1.8904    0.0000 C   0  0  0  0  0  0  0  0  0  0  0  0
    0.9948   -1.1367    0.0000 C   0  0  0  0  0  0  0  0  0  0  0  0
   -0.3328    1.4779    0.0000 C   0  0  0  0  0  0  0  0  0  0  0  0
   -1.0473    1.8904    0.0000 O   0  0  0  0  0  0  0  0  0  0  0  0
   -1.7617    1.4779    0.0000 C   0  0  0  0  0  0  0  0  0  0  0  0
   -1.7617    0.6529    0.0000 O   0  0  0  0  0  0  0  0  0  0  0  0
   -2.4762    1.8904    0.0000 N   0  0  0  0  0  0  0  0  0  0  0  0
    0.3817    1.0654    0.0000 H   0  0  0  0  0  0  0  0  0  0  0  0
   -1.7617   -0.9971    0.0000 N   0  3  0  0  0  0  0  0  0  0  0  0
    2.4762   -0.1721    0.0000 N   0  3  0  0  0  0  0  0  0  0  0  0
    1.7917   -1.3502    0.0000 O   0  0  0  0  0  0  0  0  0  0  0  0
    1.4073   -1.8511    0.0000 O   0  0  0  0  0  0  0  0  0  0  0  0
  1  2  1  0      
  2  3  1  0      
  3  4  1  0      
  4  5  1  0      
  5  6  1  0      
  6  1  1  0      
  4  7  1  0      
  7  8  1  0      
  8  9  1  0      
  9  5  1  0      
  3 10  1  0      
 10 11  1  0      
 11 12  1  0      
  6 13  1  1      
 13 14  1  0      
 14 15  1  0      
 15 16  2  0      
 15 17  1  0      
  5 18  1  1      
  4 12  1  1      
  2 19  2  0      
  8 20  2  0      
 12 21  1  0      
 12 22  1  0      
M  CHG  2  19   1  20   1
M  END
