# Supplementary material
Source: MDPI journal article supplement (https://www.mdpi.com/1660-3397/11/8/2695)
Supplement: s7 [file s7]

marinedrugs-11-02695-s004.mol
  ChemDraw12271311332D

 31 34  0  0  0  0  0  0  0  0999 V2000
    1.8003    0.2983    0.0000 C   0  0  0  0  0  0  0  0  0  0  0  0
    1.8003   -0.5267    0.0000 N   0  0  0  0  0  0  0  0  0  0  0  0
    2.5148   -0.9392    0.0000 C   0  0  0  0  0  0  0  0  0  0  0  0
    3.2292   -0.5267    0.0000 N   0  0  0  0  0  0  0  0  0  0  0  0
    3.2292    0.2983    0.0000 C   0  0  0  0  0  0  0  0  0  0  0  0
    2.5148    0.7108    0.0000 C   0  0  0  0  0  0  0  0  0  0  0  0
    1.0858    0.7108    0.0000 C   0  0  0  0  0  0  0  0  0  0  0  0
    0.3713    0.2983    0.0000 C   0  0  0  0  0  0  0  0  0  0  0  0
    0.3713   -0.5267    0.0000 N   0  3  0  0  0  0  0  0  0  0  0  0
   -0.3431    0.7108    0.0000 C   0  0  0  0  0  0  0  0  0  0  0  0
   -1.0576    0.2983    0.0000 C   0  0  0  0  0  0  0  0  0  0  0  0
   -1.0576   -0.5267    0.0000 N   0  0  0  0  0  0  0  0  0  0  0  0
   -0.3431   -0.9392    0.0000 C   0  0  0  0  0  0  0  0  0  0  0  0
   -1.7721    0.7108    0.0000 C   0  0  0  0  0  0  0  0  0  0  0  0
   -2.4865    0.2983    0.0000 C   0  0  0  0  0  0  0  0  0  0  0  0
   -2.4865   -0.5267    0.0000 C   0  0  0  0  0  0  0  0  0  0  0  0
   -1.7721   -0.9392    0.0000 C   0  0  0  0  0  0  0  0  0  0  0  0
    2.5148   -1.7642    0.0000 O   0  0  0  0  0  0  0  0  0  0  0  0
   -1.5585   -1.7361    0.0000 C   0  0  0  0  0  0  0  0  0  0  0  0
   -0.7617   -1.9496    0.0000 N   0  3  0  0  0  0  0  0  0  0  0  0
    1.0858    1.5358    0.0000 O   0  0  0  0  0  0  0  0  0  0  0  0
    0.3713    1.1233    0.0000 H   0  0  0  0  0  0  0  0  0  0  0  0
   -3.2010   -0.9392    0.0000 C   0  0  0  0  0  0  0  0  0  0  0  0
   -2.4865   -1.3517    0.0000 H   0  0  0  0  0  0  0  0  0  0  0  0
    4.0261    0.5118    0.0000 O   0  0  0  0  0  0  0  0  0  0  0  0
   -1.0576    1.1233    0.0000 H   0  0  0  0  0  0  0  0  0  0  0  0
   -3.2011    1.9496    0.0000 O   0  0  0  0  0  0  0  0  0  0  0  0
   -3.2011    1.1246    0.0000 S   0  0  0  0  0  0  0  0  0  0  0  0
   -2.3761    1.1246    0.0000 O   0  0  0  0  0  0  0  0  0  0  0  0
   -4.0261    1.1246    0.0000 O   0  0  0  0  0  0  0  0  0  0  0  0
   -3.2011    0.2996    0.0000 O   0  5  0  0  0  0  0  0  0  0  0  0
  1  2  1  0      
  2  3  2  0      
  3  4  1  0      
  4  5  1  0      
  5  6  1  0      
  6  1  2  0      
  1  7  1  0      
  7  8  1  0      
  8  9  1  0      
  8 10  1  0      
 10 11  1  0      
 11 12  1  0      
 12 13  4  0      
 13  9  4  0      
 11 14  1  0      
 14 15  1  0      
 15 16  1  0      
 16 17  1  0      
 17 12  1  0      
  3 18  1  0      
 17 19  1  0      
 19 20  1  0      
 13 20  4  0      
  7 21  1  6      
  8 22  1  1      
 16 23  1  1      
 17 24  1  1      
  5 25  2  0      
 11 26  1  1      
 15 27  1  1      
 27 28  1  0      
 28 29  2  0      
 28 30  2  0      
 28 31  1  0      
M  CHG  3   9   1  20   1  31  -1
M  STY  1   1 SUP
M  SLB  1   1   1
M  SAL   1  5  27  28  29  30  31
M  SBL   1  1  30
M  SMT   1 OSO3-
M  SBV   1 30   -8.0792    7.4565
M  END
